# Supplementary material for: Bi-Level Positive Airway Pressure for Non-invasive Respiratory Support of Foals
Source: Frontiers journal article supplement (doi:10.3389/fvets.2021.741720), 2021-09-29

Supplementary Table S1: Research foals and treatment schedule used in the current study. All foals were sired by a Connemara stallion out of Standardbred (F2 and F7) or Thoroughbred (F5, F6, F8, F9) mares. There were two colts (F2 and F6) and four fillies. DOB, date of birth; BW, body weight; T2, treatment allocated to T2; T4, treatment allocated to T4; interval, time between Phase 1 and Phase 2 for each foal.

| Foal | Gender | DOB        | Phase 1    |            |            |                |                | Phase 2    |            |            |                |                | Interval<br>(d) |
|------|--------|------------|------------|------------|------------|----------------|----------------|------------|------------|------------|----------------|----------------|-----------------|
|      |        |            | Date       | Age<br>(d) | BW<br>(kg) | T2             | T4             | Date       | Age<br>(d) | BW<br>(kg) | T2             | T4             |                 |
| F2   | M      | 27/08/2018 | 18/10/2018 | 52         | 111        | O <sub>2</sub> | BiPAP          | 24/10/2018 | 58         | 126        | BiPAP          | O <sub>2</sub> | 6               |
| F6   | M      | 31/08/2018 | 19/10/2018 | 49         | 121        | BiPAP          | O <sub>2</sub> | 24/10/2018 | 54         | 131        | O <sub>2</sub> | BiPAP          | 5               |
| F9   | F      | 1/09/2018  | 19/10/2018 | 48         | 125        | O <sub>2</sub> | BiPAP          | 23/10/2018 | 52         | 132        | BiPAP          | O <sub>2</sub> | 4               |
| F7   | F      | 5/09/2018  | 22/10/2018 | 47         | 110        | BiPAP          | O <sub>2</sub> | 26/10/2018 | 51         | 114        | O <sub>2</sub> | BiPAP          | 4               |
| F8   | F      | 9/09/2018  | 23/10/2018 | 44         | 114        | O <sub>2</sub> | BiPAP          | 26/10/2018 | 47         | 118        | BiPAP          | O <sub>2</sub> | 3               |
| F5   | F      | 28/10/2018 | 13/12/2018 | 46         | 86         | BiPAP          | O <sub>2</sub> | 18/12/2018 | 51         | 92         | O <sub>2</sub> | BiPAP          | 5               |

Supplementary Figure S1: BiPAP ventilator, spirometer and gas analyser (top), mask with vented non-rebreathing elbow valve (A) and spirometry flow head (B). Oxygen was added to the circuit at C.

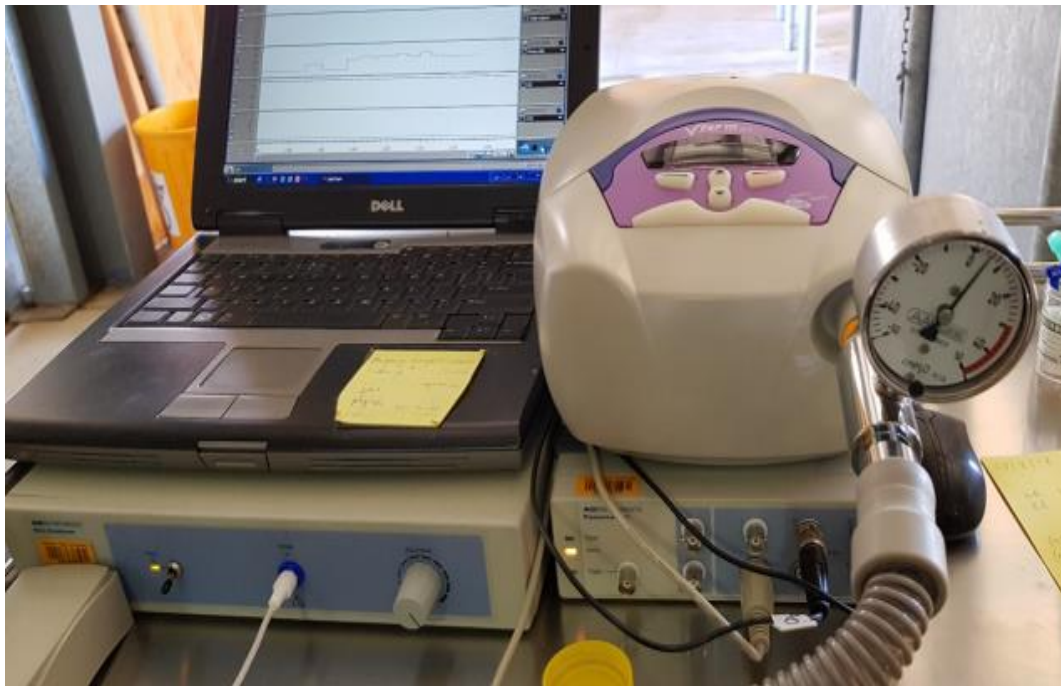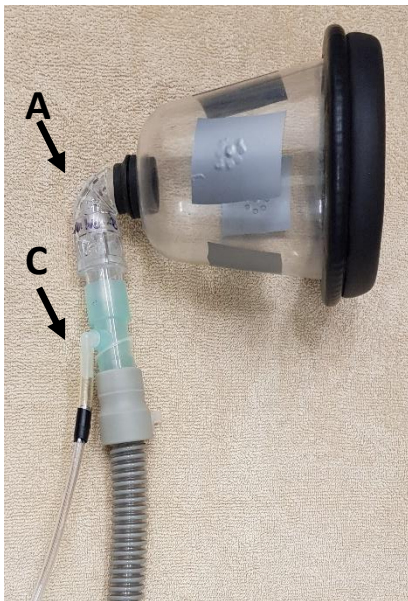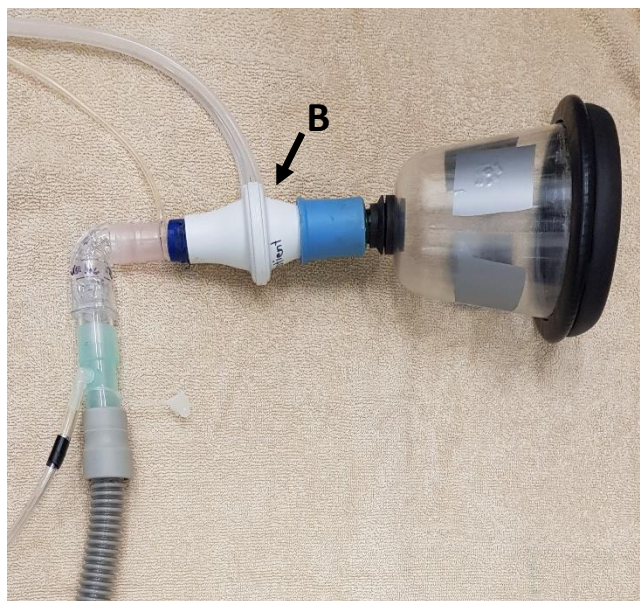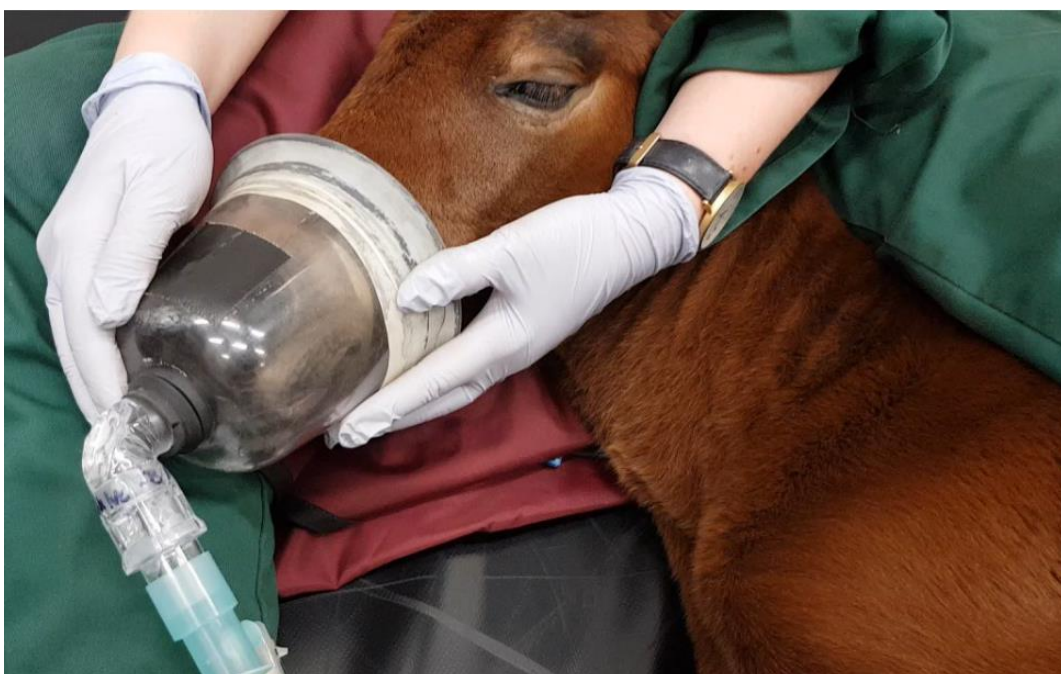

Supplementary Figure S2: Effect of sequence (BiPAP or supplementary O<sub>2</sub> as the first administered treatment) on heart rate (HR), observed respiratory rate (RR), rectal temperature (temp) and mean arterial pressure (MAP). A significant effect of time ( $P<0.001$ ) was observed for all variables except MAP ( $P=0.529$ ), but there were no effects attributable to sequence (O<sub>2</sub>-BiPAP, supplementary O<sub>2</sub> at T2, BiPAP at T4; BiPAP-O<sub>2</sub>, BiPAP at T2, supplementary O<sub>2</sub> at T4). Data are shown as mean and standard deviation.

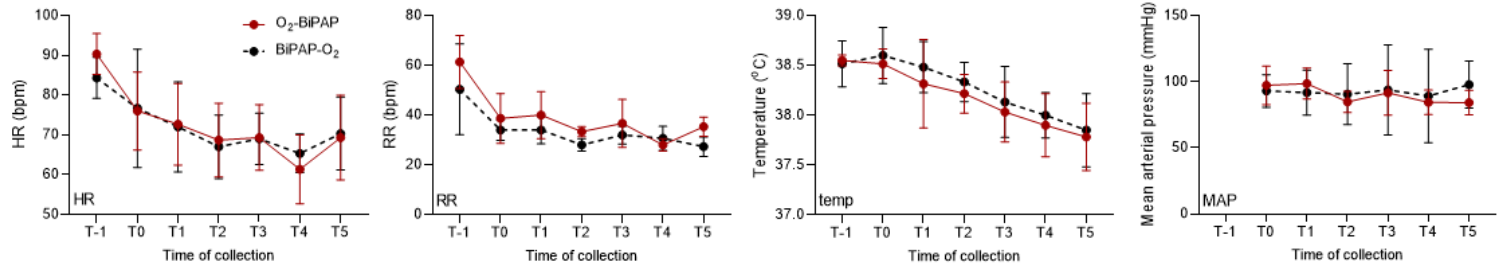

Supplementary Figure S3: Effect of sequence (BiPAP or supplementary O<sub>2</sub> as the first administered treatment) on blood gas parameters. A significant effect of time was observed for the partial pressure of O<sub>2</sub> (PaO<sub>2</sub>), CO<sub>2</sub> (PaCO<sub>2</sub>) and pH (all  $P<0.001$ ), and for lactate ( $P=0.012$ ). There were no effects attributable to sequence (O<sub>2</sub>-BiPAP, supplementary O<sub>2</sub> at T2, BiPAP at T4; BiPAP-O<sub>2</sub>, BiPAP at T2, supplementary O<sub>2</sub> at T4). Data are shown as mean and standard deviation.

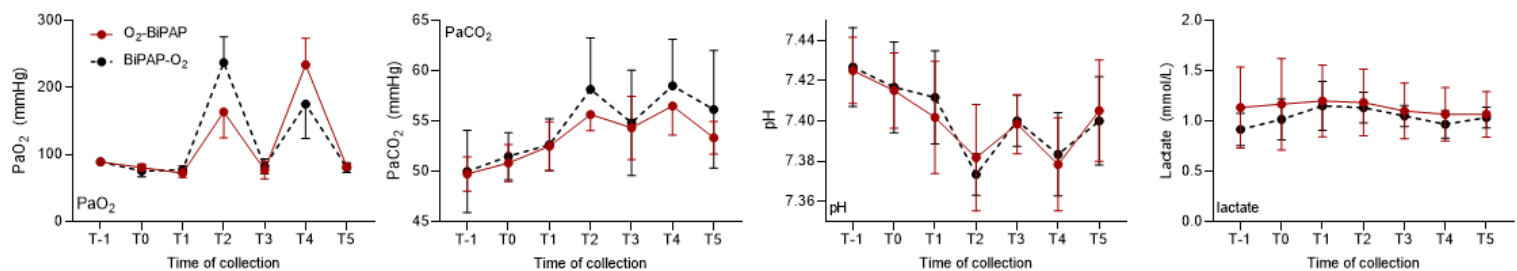

Supplementary Figure S4: Effect of sequence (BiPAP or supplementary O<sub>2</sub> as the first administered treatment) on spirometry results. A significant effect of time was observed for respiratory rate during spirometry (RR,  $P=0.032$ ), tidal volume (Vt,  $P<0.001$ ), inspiratory time (Ti,  $P=0.027$ ), expiratory time (Te,  $P=0.05$ ), peak expiratory flow (PEF,  $P<0.001$ ) and peak inspiratory flow (PIF,  $P=0.039$ ). Significant time-sequence interactions were observed for RRs ( $P<0.001$ ), Vt ( $P<0.001$ ), Ti ( $P=0.008$ ), Te ( $P<0.001$ ) and PIF ( $P=0.001$ ) with significant effects observed between results obtained following O<sub>2</sub> supplementation and following BiPAP at T2, as shown; other pairwise comparisons were not significant. The time-sequence interaction for PEF was not significant ( $P=0.291$ ). Data are shown as mean and standard deviation.

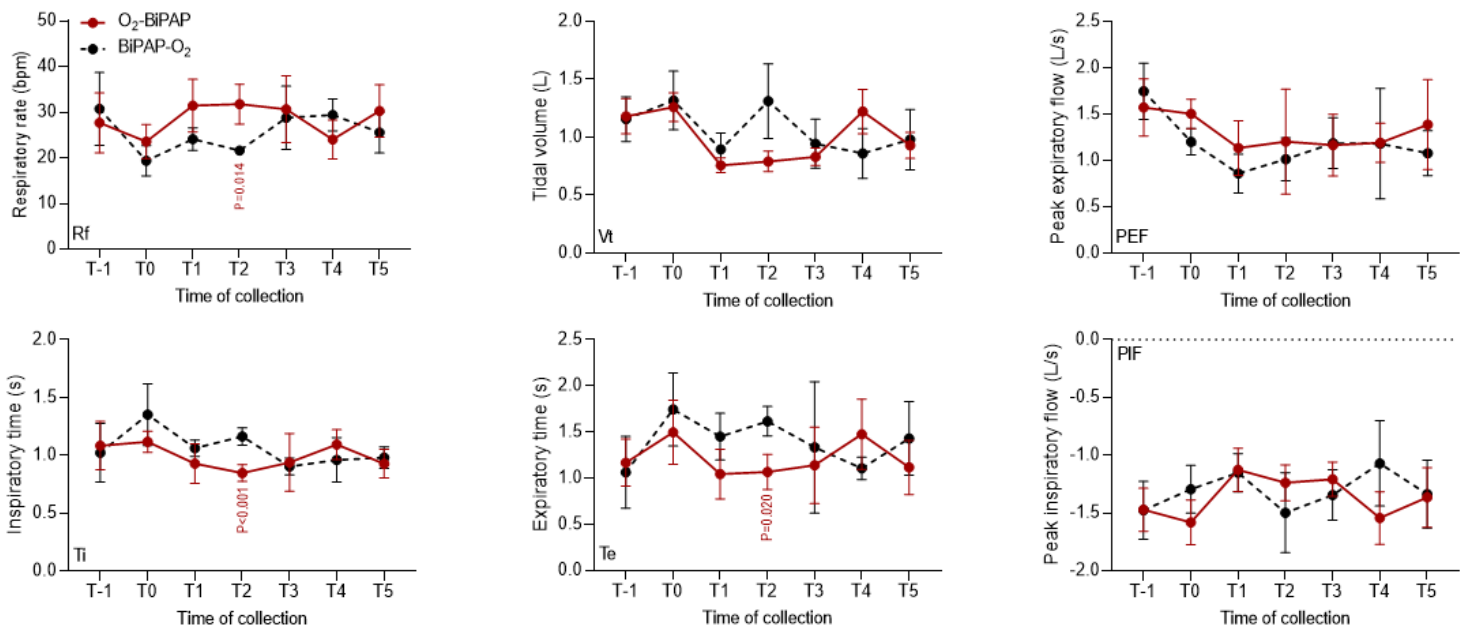



Supplementary Figure S5: Effect of sequence (BiPAP or supplementary O<sub>2</sub> as the first administered treatment) on inhaled and exhaled gas parameters. Significant time effects were observed for the maximum inspired O<sub>2</sub> concentration (FiO<sub>2</sub>max), minimum observed O<sub>2</sub> concentration (FiO<sub>2</sub>min) and O<sub>2</sub> extraction (all  $P < 0.001$ ). Significant time-sequence interactions were observed (all  $P \leq 0.001$ ), and significant pairwise comparisons are shown. Significant time effects were also observed for maximum expired CO<sub>2</sub> concentrations (FeCO<sub>2</sub>max,  $P = 0.023$ ), CO<sub>2</sub> elimination ( $P = 0.001$ ), but not for minimum CO<sub>2</sub> concentrations (insp CO<sub>2</sub>,  $P = 0.438$ ). Time-sequence interactions were significant for all CO<sub>2</sub> parameters ( $P = 0.014$ ,  $P = 0.002$  and  $P = 0.004$ , respectively), but pairwise comparisons were not significant. There were no effects attributable to sequence. Data are shown as mean and standard deviation.

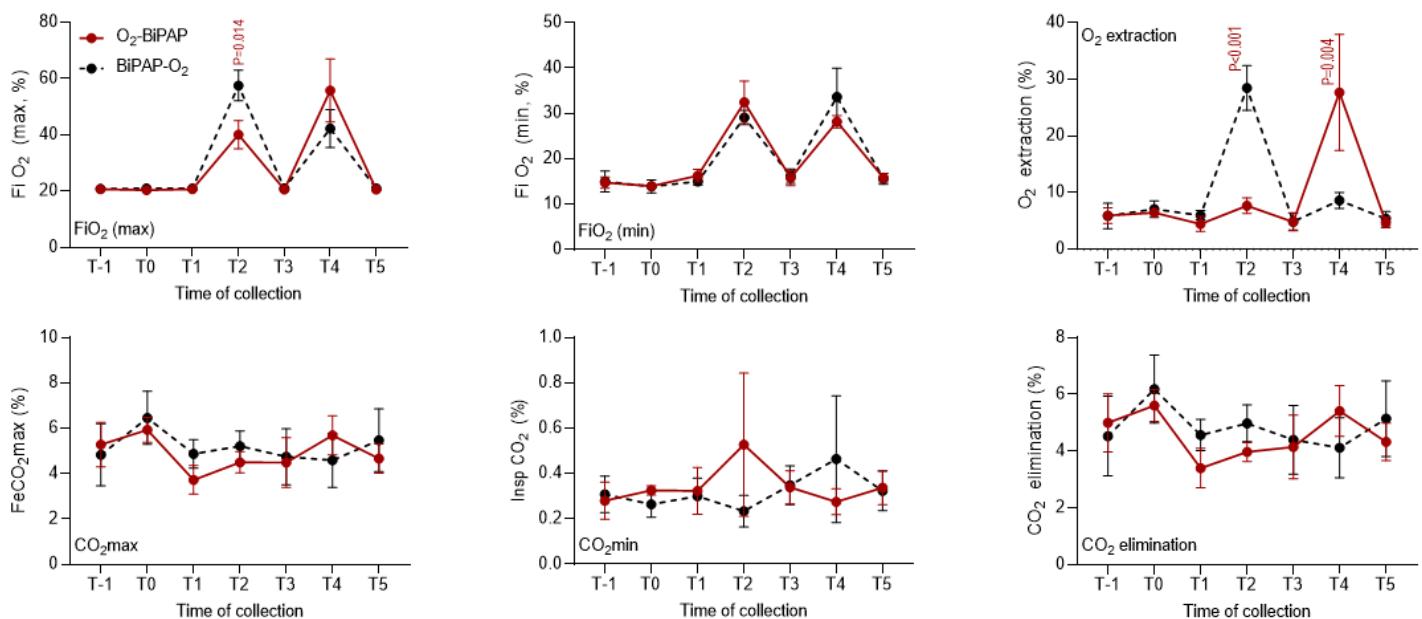

Supplement: Presentation_1.PDF [file Presentation_1.PDF]
